# Supplementary material for: Sulforaphane inhibits the production of Aβ partially through the activation of Nrf2-regulated oxidative stress
Source: Royal Society of Chemistry journal article supplement (doi:10.1039/d1fo02651h), 2021-01-01
Supplement: d1fo02651h1.pdf [file d1fo02651h1.pdf]

## Supporting Information

Figure S1

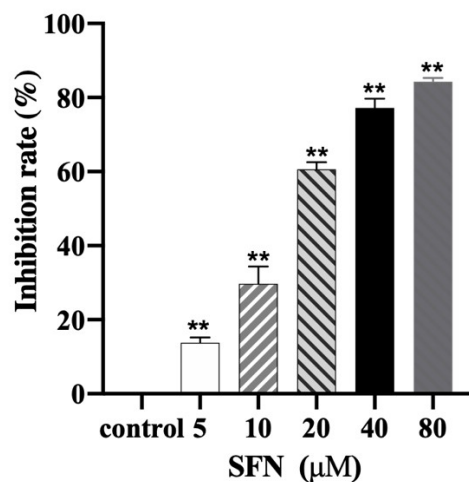

**Figure S1. IC<sub>50</sub> measurement of SFN in N2a/APP cell.** N2a/APP cells were treated with different concentrations of SFN (5, 10, 20, 40, 80 μM), respectively for 24 h. Then the inhibition rate was analyzed by CCK-8 detecting kit. Data were presented as mean ± SD. Compared with control group, \*\*P < 0.01.
